# Supplementary material
Source: PubMed Central journal article supplement (PMC4789157)
Supplement: NIHMS740434-supplement-01.pdf [file NIHMS740434-supplement-01.pdf]

**Online Repository Legends.**

**Online Repository Figure 1.** Pregnancy Asthma Control Test questions.

**Online Repository Figure 2.** Guideline-based asthma impairment questions.

**Online Repository Figure 1.** Pregnancy Asthma Control Test questions.

1. In the past 4 weeks, how much of the time did your asthma keep you from getting as much done at work or at home?
  - 1) All of the time
  - 2) Most of the time
  - 3) Some of the time
  - 4) A little of the time
  - 5) None of the time
  
2. During the past 4 weeks, how often did you have shortness of breath due to your asthma?
  - 1) More than once a day
  - 2) Once a day
  - 3) 3 to 6 times a week
  - 4) Once or twice a week
  - 5) Not at all
  
3. During the past 4 weeks, how often did your asthma symptoms (wheezing, coughing, shortness of breath, chest tightness or pain) wake you up at night or earlier than usual in the morning?
  - 1) 4 or more nights a week
  - 2) 2 or 3 nights a week
  - 3) Once a week
  - 4) Once or twice
  - 5) Not at all
  
4. During the past 4 weeks, how often have you used your rescue inhaler or nebulizer medication (such as albuterol)?
  - 1) 3 or more times per day
  - 2) 1 to 2 times per day
  - 3) 2 to 3 times per week
  - 4) Once or twice
  - 5) Not at all
  
5. How would you rate your asthma control during the past 4 weeks?
  - 1) Not controlled at all
  - 2) Poorly controlled
  - 3) Somewhat controlled
  - 4) Well-controlled
  - 5) Completely controlled

**Online Repository Figure 2.** Guideline-based asthma impairment questions.<sup>12</sup>

For the questions below, choose the responses that best describe your asthma over the past 4 weeks

1. In the past 4 weeks, how frequently have you had asthma symptoms?
  - a) Less than 3 days a week
  - b) 3 or more days a week
  - c) Daily throughout the day
  
2. In the past 4 weeks, how frequently has your asthma awakened you from sleep at night?
  - a) Less than 3 nights in past 4 weeks
  - b) 1-3 nights a week
  - c) 4 or more nights a week
  
3. In the past 4 weeks, how much has your asthma interfered with your normal activity?
  - a) None
  - b) Some limitation
  - c) Extremely limited
